# Supplementary material
Source: Springer Nature journal article supplement (https://www.springermedizin.de/resource/supplementary/12889_2010_3011_MOESM2_ESM.pdf/9487842)

**a.**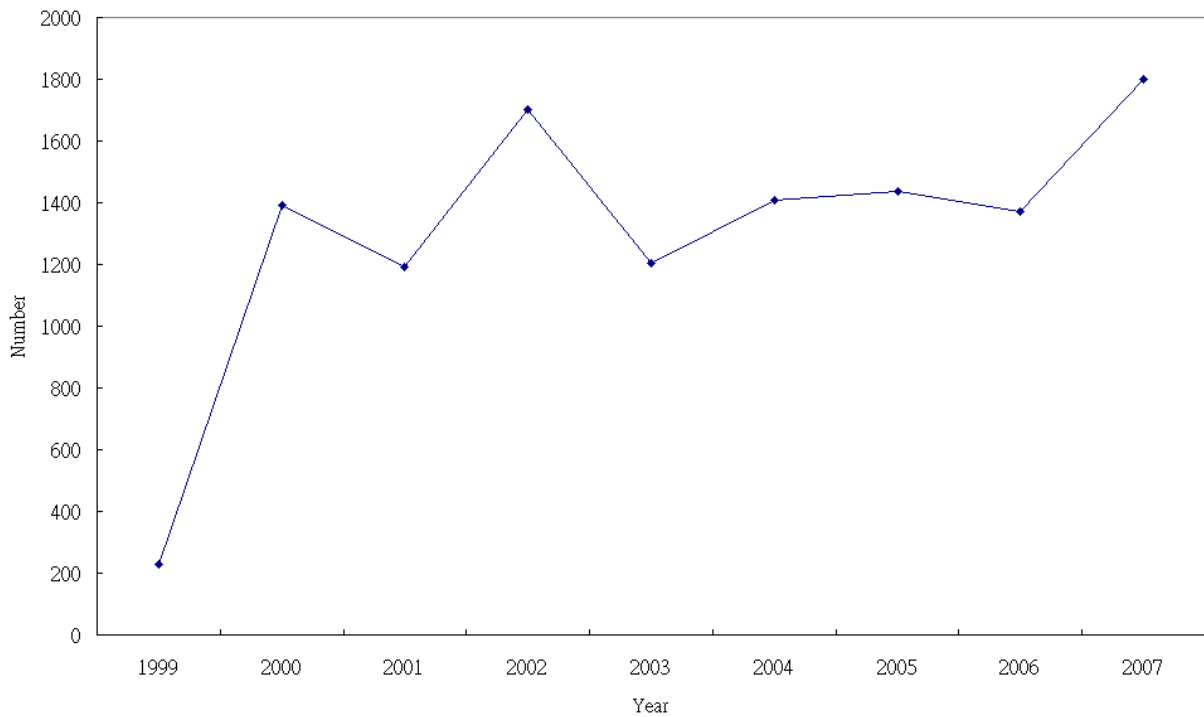**b.**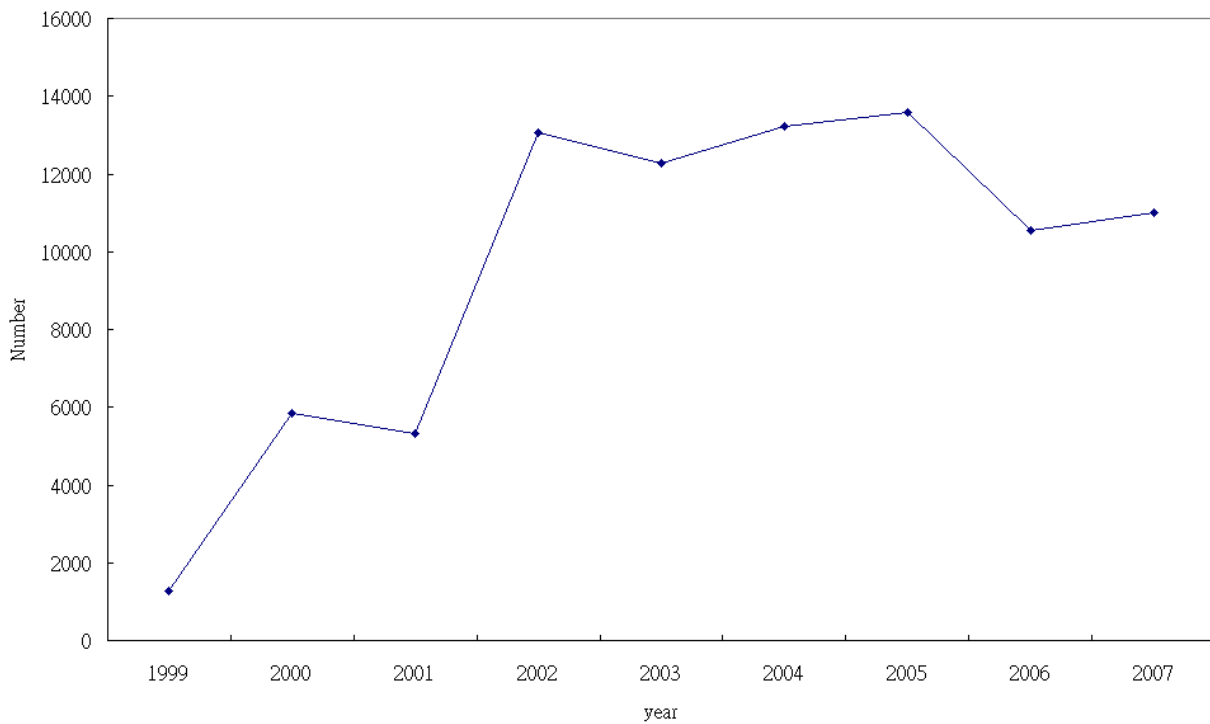

Supplement: MOESM2 [file 9487842]
